# Supplementary material for: Development of competitive indirect ELISAs with a flexible working range for the simple quantification of melatonin in medicinal foods
Source: Royal Society of Chemistry journal article supplement (doi:10.1039/c6ay03380f), 2017-01-01
Supplement: c6ay03380f1.pdf [file c6ay03380f1.pdf]

1 **Development of competitive indirect ELISAs with flexible working range for the simple**  
2 **quantification of melatonin in medicinal foods**

3

4 Zi-Jian Chen<sup>a</sup>, Hui-Jun Fu<sup>a</sup>, Lin Luo<sup>a</sup>, Yuan-Ming Sun<sup>a,\*</sup>, Jin-Yi Yang<sup>a</sup>, Dao-Ping Zeng<sup>b</sup>, Yu-Dong Shen<sup>a</sup>,  
5 Zhen-Lin Xu<sup>a,\*</sup>

6

7 <sup>a</sup> *Guangdong Provincial Key Laboratory of Food Quality and Safety, South China Agricultural University,*  
8 *Guangzhou 510642, China*

9 <sup>b</sup> *Guangzhou Wanlian Biological Technology Co., Ltd, Guangzhou 510000, China*

10

11

12

13 \* Corresponding author. Tel.: +86 20 8528 3925; fax: +86 20 8528 0270.

14 *E-mail address:* ymsun@scau.edu.cn (Y.-M. Sun); jallent@163.com (Z.-L. Xu)

15

16

17

18 \* Corresponding author. Tel.: +86 20 8528 3925; fax: +86 20 8528 0270.

19 *E-mail address:* ymsun@scau.edu.cn (Y.-M. Sun); jallent@163.com (Z.-L. Xu)

20

21

22

23

24

25

26

27

28

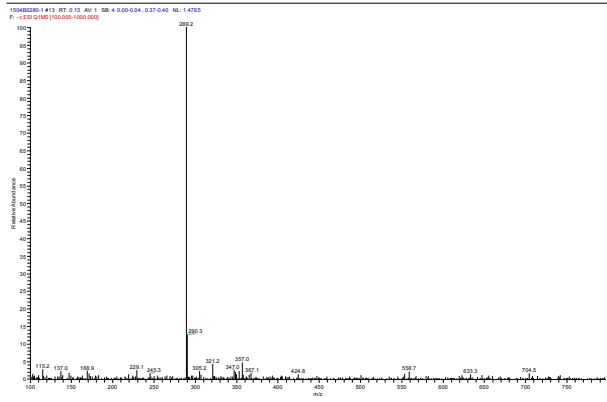

Mass spectrum of hapten A

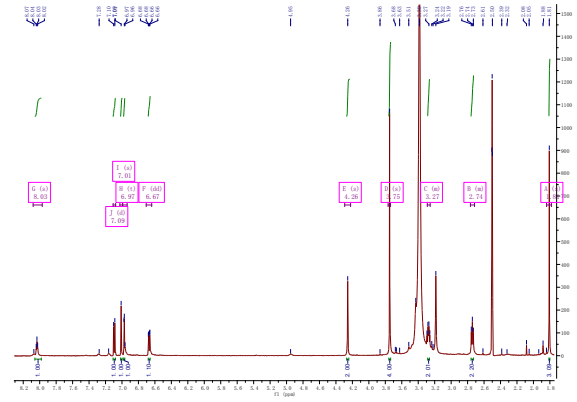

NMR spectrum of hapten A

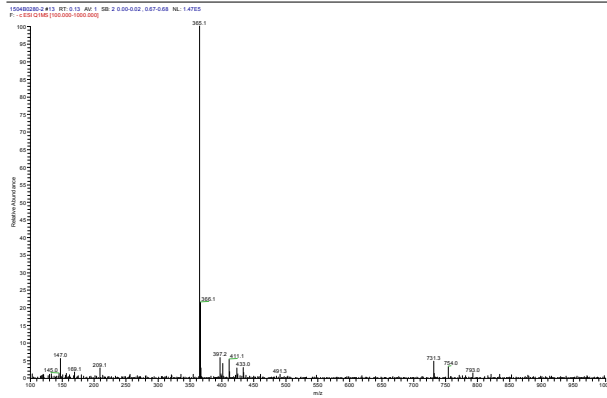

Mass spectrum of hapten B

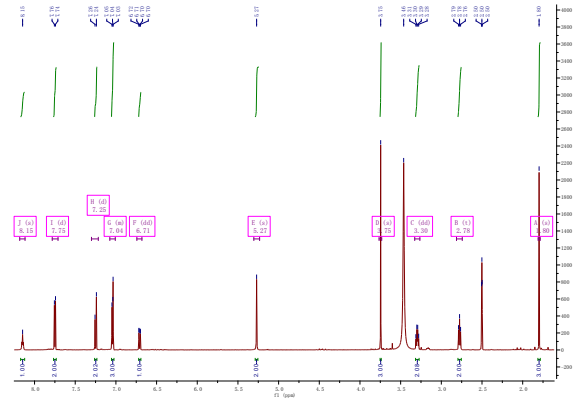

NMR spectrum of hapten B

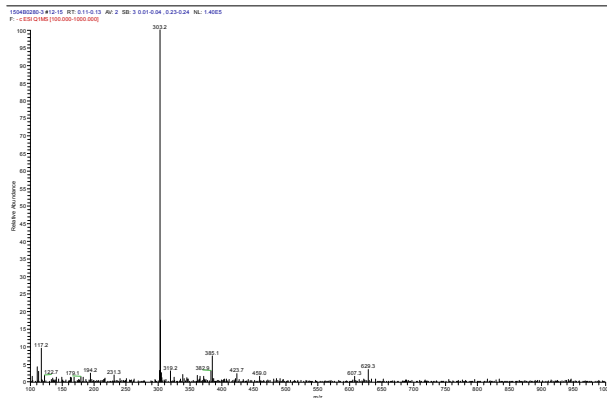

Mass spectrum of hapten C

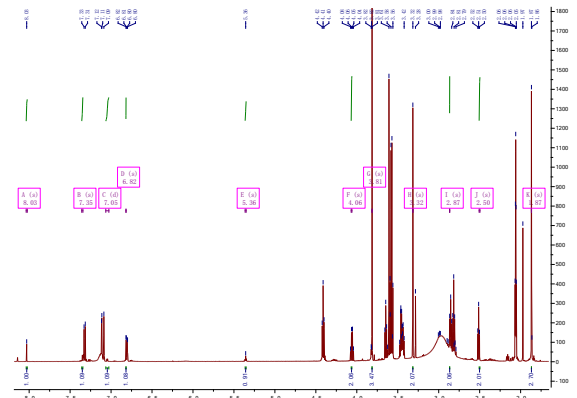

NMR spectrum of hapten C

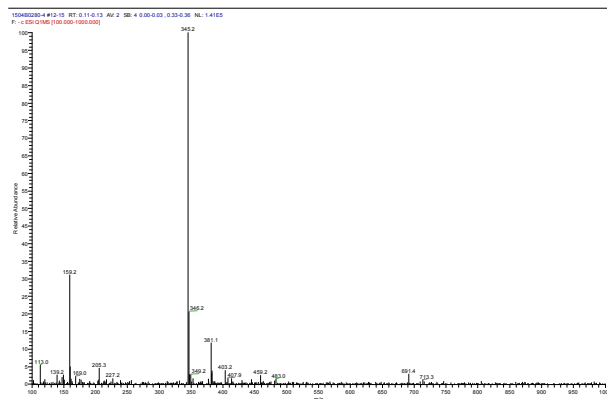

Mass spectrum of hapten D

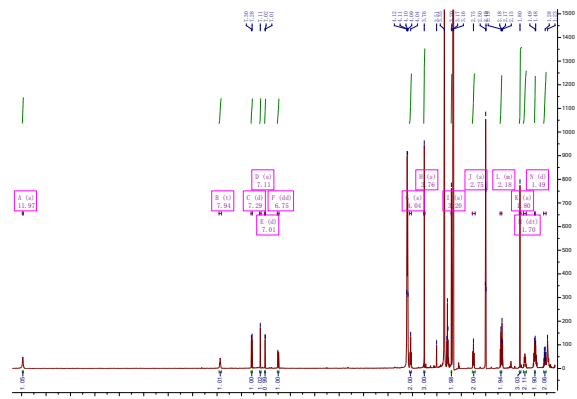

NMR spectrum of hapten D

Figure S1. Mass and NMR spectrograms of MT haptens

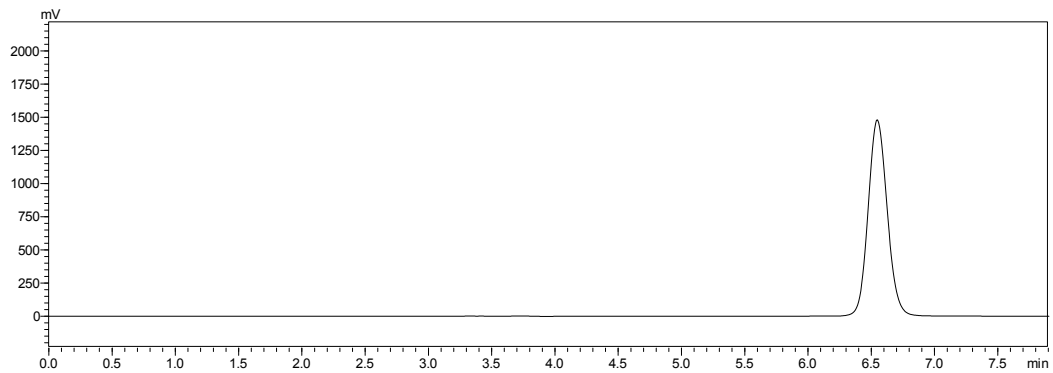

Figure S2. Chromatography of melatonin standard

40  
41  
42  
43  
44  
45  
46  
47  
48  
49  
50  
51  
52  
53  
54  
55  
56  
57  
58  
59  
60  
61  
62  
63  
64  
65  
66  
67  
68  
69  
70

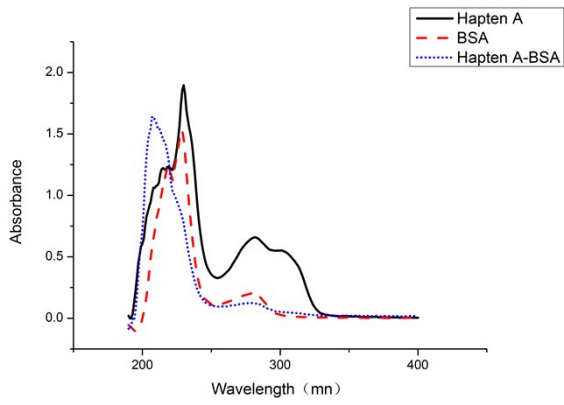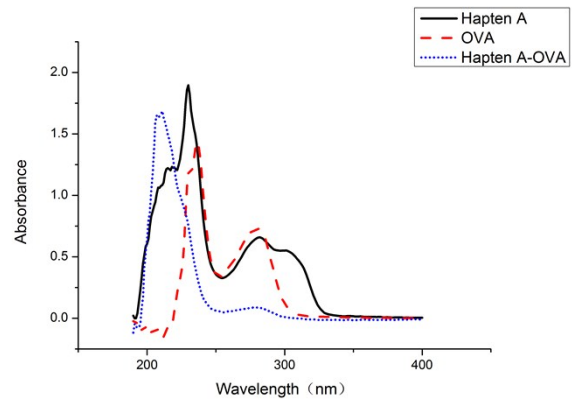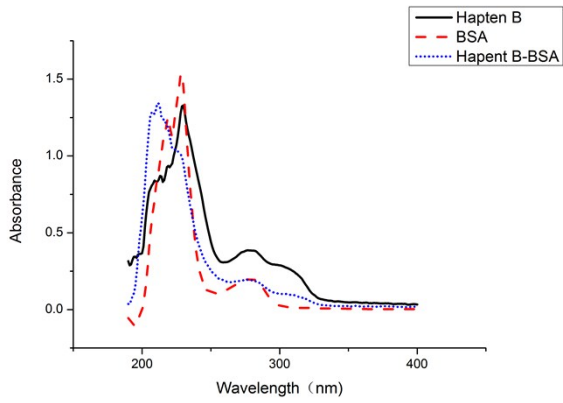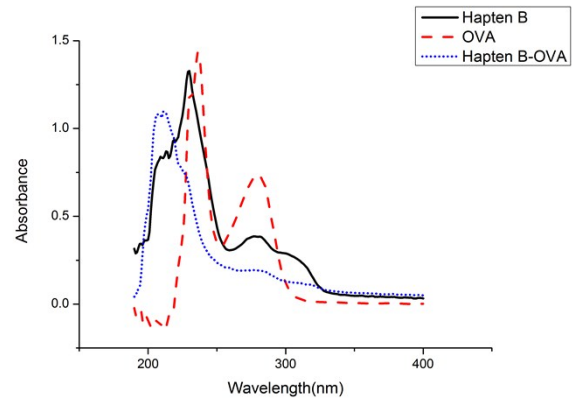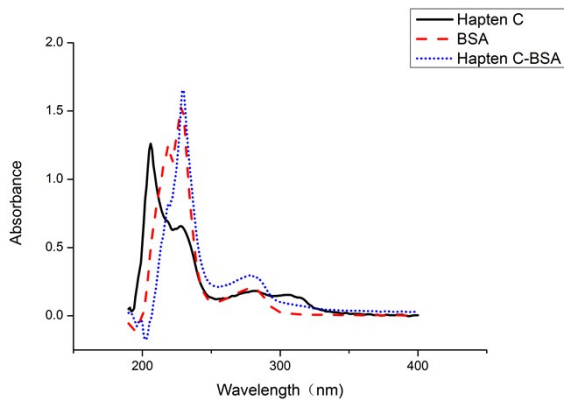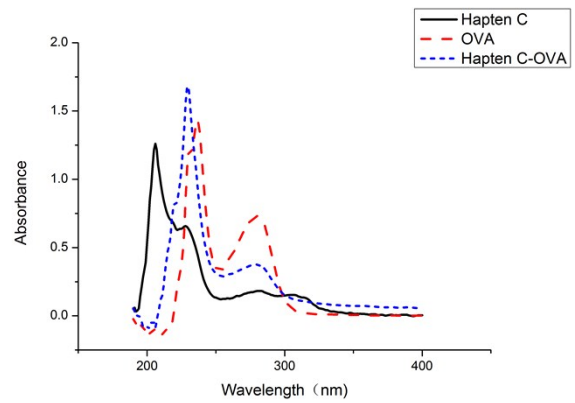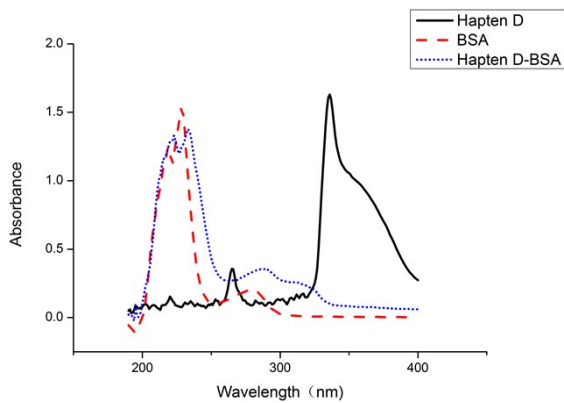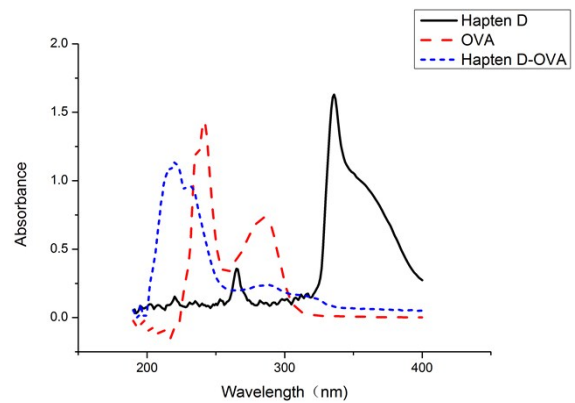

Figure S3. Ultraviolet scanning of synthesized antigens

71

72

73

74

75

76

77

78

79

80

81

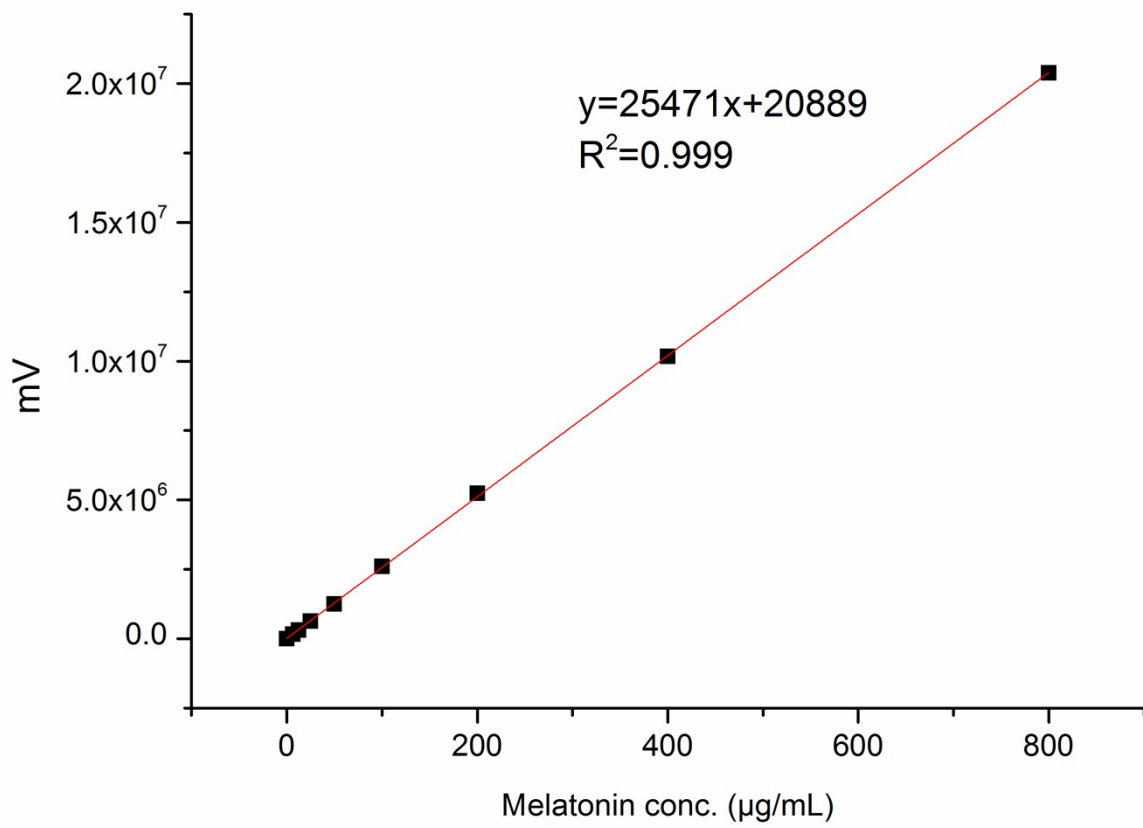

Figure S4. Calibration curve for histamine in LC-MS/MS.

82  
83  
84  
85  
86  
87  
88  
89  
90  
91  
92  
93  
94  
95  
96  
97  
98  
99  
100  
101  
102  
103  
104  
105  
106

107 Table S1. Effect of physicochemical parameters on heterologous ciELISA performance (n=3)

| Parameters                               | A <sub>max</sub> | IC <sub>50</sub> (ng/mL) | A <sub>max</sub> / IC <sub>50</sub> |
|------------------------------------------|------------------|--------------------------|-------------------------------------|
| Coating concentration /antibody dilution |                  |                          |                                     |
| 2μg·mL <sup>-1</sup> /1:16000            | 1.49             | 18.68                    | 0.080                               |
| 1μg·mL <sup>-1</sup> /1:8000             | 1.15             | 25.61                    | 0.045                               |
| 0.5μg·mL <sup>-1</sup> /1:4000           | 1.05             | 11.05                    | 0.095                               |
| 0.25μg·mL <sup>-1</sup> /1:2000          | 1.42             | 8.07                     | 0.176                               |
| 0.125μg·mL <sup>-1</sup> /1:1000         | 1.36             | 12.70                    | 0.107                               |
| Ionic strength                           |                  |                          |                                     |
| 0.01M                                    | 1.42             | 4.62                     | 0.308                               |
| 0.02M                                    | 0.95             | 23.60                    | 0.040                               |
| 0.04M                                    | 0.78             | 5.47                     | 0.143                               |
| 0.08M                                    | 1.01             | 24.13                    | 0.042                               |
| 0.1M                                     | 1.32             | 6.24                     | 0.211                               |
| Tween-20                                 |                  |                          |                                     |
| 0                                        | 1.76             | 9.52                     | 0.184                               |
| 0.10%                                    | 1.43             | 26.04                    | 0.055                               |
| 0.20%                                    | 1.10             | 28.84                    | 0.038                               |
| 0.30%                                    | 0.78             | 54.61                    | 0.014                               |
| 0.40%                                    | 0.76             | 33.47                    | 0.023                               |
| pH value                                 |                  |                          |                                     |
| 5.4                                      | 1.45             | 7.13                     | 0.204                               |
| 6.4                                      | 1.38             | 10.68                    | 0.129                               |
| 7.4                                      | 1.03             | 19.27                    | 0.053                               |
| 8.4                                      | 1.16             | 15.46                    | 0.075                               |
| 9.4                                      | 1.22             | 9.39                     | 0.130                               |

108

109

110

111

112

113

114

115 Table S2. Effect of physicochemical parameters on homologous ciELISA performance (n=3)

| Parameters                               | A <sub>max</sub> | IC <sub>50</sub> (µg/mL) | A <sub>max</sub> / IC <sub>50</sub> |
|------------------------------------------|------------------|--------------------------|-------------------------------------|
| Coating concentration /antibody dilution |                  |                          |                                     |
| 2µg·mL <sup>-1</sup> /1:64000            | 2.17             | 24.19                    | 0.019                               |
| 1µg·mL <sup>-1</sup> /1:32000            | 1.99             | 2.51                     | 0.200                               |
| 0.5µg·mL <sup>-1</sup> /1:16000          | 1.97             | 1.64                     | 0.311                               |
| 0.25µg·mL <sup>-1</sup> /1:16000         | 1.97             | 1.19                     | 0.427                               |
| 0.125µg·mL <sup>-1</sup> /1:8000         | 1.89             | 2.93                     | 0.180                               |
| Ionic strength                           |                  |                          |                                     |
| 0.01M                                    | 1.97             | 4.76                     | 0.414                               |
| 0.02M                                    | 1.72             | 3.55                     | 0.484                               |
| 0.04M                                    | 1.64             | 1.43                     | 1.150                               |
| 0.08M                                    | 1.69             | 0.35                     | 4.832                               |
| 0.1M                                     | 1.58             | 2.33                     | 0.677                               |
| Tween-20                                 |                  |                          |                                     |
| 0                                        | 1.91             | 6.44                     | 0.297                               |
| 0.10%                                    | 1.93             | 6.24                     | 0.310                               |
| 0.20%                                    | 1.93             | 8.41                     | 0.230                               |
| 0.30%                                    | 1.91             | 130.63                   | 0.015                               |
| 0.40%                                    | 2.16             | 10.68                    | 0.202                               |
| pH value                                 |                  |                          |                                     |
| 5.4                                      | 2.14             | 4.88                     | 0.438                               |
| 6.4                                      | 1.17             | 5.66                     | 0.207                               |
| 7.4                                      | 1.34             | 2.17                     | 0.619                               |
| 8.4                                      | 1.05             | 1.76                     | 0.598                               |
| 9.4                                      | 1.50             | 2.79                     | 0.539                               |

116

117

118

119

120

121

122

123

124

Table S3. The RSD of inter-day of calibration curve (n=3)

| Days          | $A_{\max}$      | $IC_{50}$ ( $\mu\text{g/mL}$ ) |
|---------------|-----------------|--------------------------------|
| 1             | 1.78            | 6.52                           |
| 2             | 1.67            | 7.26                           |
| 3             | 1.79            | 6.81                           |
| 4             | 1.65            | 7.01                           |
| 5             | 1.74            | 7.79                           |
| Mean $\pm$ SD | $1.73 \pm 0.06$ | $7.08 \pm 0.48$                |
| RSD           | 3.60%           | 6.77%                          |

125

126
